# Supplementary material
Source: publisher figshare collection journal article supplement (https://karger.figshare.com/ndownloader/files/28959546)
Supplement: Supplementary file 1 [file 28959546]

**
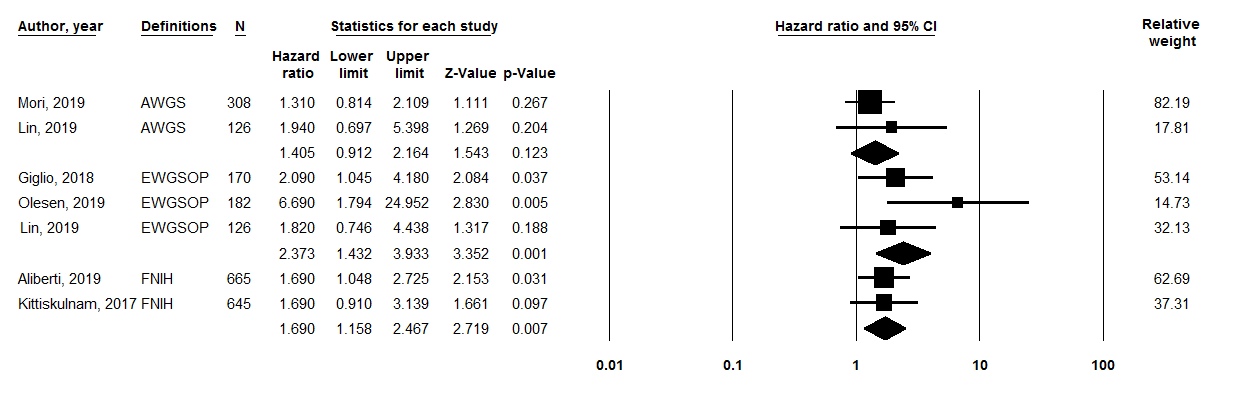
Supplementary Figure 2.** Meta-analysis of the association between sarcopenia and mortality in outpatients presented in hazard ratios, stratified by definition

Heterogeneity (I2): AWGS (0%), EWGSOP (29.8%), FNIH (0.0%). AWGS: Asian Working Group for Sarcopenia, EWGSOP: European Working Group on Sarcopenia in Older People 2010, FNIH: Foundation for the National Institutes of Health
